# Supplementary material
Source: HighWire-hosted journal article supplement (http://ajnr-stage2.highwire.org/highwire/filestream/52353/field_highwire_adjunct_files/0/3145_shortform.pdf)
Supplement: 3145_shortform.pdf [file 3145_shortform.pdf]

## Physical Functioning – Short Form 1

Please respond to each item by marking one box per row.

|       |                                                                                                                                              | Not at all                    | Very little                   | Somewhat                      | Quite a lot                   | Cannot do                     |
|-------|----------------------------------------------------------------------------------------------------------------------------------------------|-------------------------------|-------------------------------|-------------------------------|-------------------------------|-------------------------------|
| PFA01 | Does your health now limit you in doing vigorous activities, such as running, lifting heavy objects, participating in strenuous sports?..... | <input type="checkbox"/><br>5 | <input type="checkbox"/><br>4 | <input type="checkbox"/><br>3 | <input type="checkbox"/><br>2 | <input type="checkbox"/><br>1 |
| PFC36 | Does your health now limit you in walking more than a mile?.....                                                                             | <input type="checkbox"/><br>5 | <input type="checkbox"/><br>4 | <input type="checkbox"/><br>3 | <input type="checkbox"/><br>2 | <input type="checkbox"/><br>1 |
| PFC37 | Does your health now limit you in climbing one flight of stairs?.....                                                                        | <input type="checkbox"/><br>5 | <input type="checkbox"/><br>4 | <input type="checkbox"/><br>3 | <input type="checkbox"/><br>2 | <input type="checkbox"/><br>1 |
| PFA05 | Does your health now limit you in lifting or carrying groceries?.....                                                                        | <input type="checkbox"/><br>5 | <input type="checkbox"/><br>4 | <input type="checkbox"/><br>3 | <input type="checkbox"/><br>2 | <input type="checkbox"/><br>1 |
| PFA03 | Does your health now limit you in bending, kneeling, or stooping?.....                                                                       | <input type="checkbox"/><br>5 | <input type="checkbox"/><br>4 | <input type="checkbox"/><br>3 | <input type="checkbox"/><br>2 | <input type="checkbox"/><br>1 |
|       |                                                                                                                                              | Without any difficulty        | With a little difficulty      | With some difficulty          | With much difficulty          | Unable to do                  |
| PFA11 | Are you able to do chores such as vacuuming or yard work?.....                                                                               | <input type="checkbox"/><br>5 | <input type="checkbox"/><br>4 | <input type="checkbox"/><br>3 | <input type="checkbox"/><br>2 | <input type="checkbox"/><br>1 |
| PFA16 | Are you able to dress yourself, including tying shoelaces and doing buttons?.....                                                            | <input type="checkbox"/><br>5 | <input type="checkbox"/><br>4 | <input type="checkbox"/><br>3 | <input type="checkbox"/><br>2 | <input type="checkbox"/><br>1 |
| PFB26 | Are you able to shampoo your hair?.....                                                                                                      | <input type="checkbox"/><br>5 | <input type="checkbox"/><br>4 | <input type="checkbox"/><br>3 | <input type="checkbox"/><br>2 | <input type="checkbox"/><br>1 |
| PFA55 | Are you able to wash and dry your body?.....                                                                                                 | <input type="checkbox"/><br>5 | <input type="checkbox"/><br>4 | <input type="checkbox"/><br>3 | <input type="checkbox"/><br>2 | <input type="checkbox"/><br>1 |
| PFC45 | Are you able to get on and off the toilet?.....                                                                                              | <input type="checkbox"/><br>5 | <input type="checkbox"/><br>4 | <input type="checkbox"/><br>3 | <input type="checkbox"/><br>2 | <input type="checkbox"/><br>1 |

## Pain Impact – Short Form 1

Please respond to each item by marking one box per row.

In the past 7 days...

|          |                                                                                                                   | Not at all                    | A little bit                  | Somewhat                      | Quite a bit                   | Very much                     |
|----------|-------------------------------------------------------------------------------------------------------------------|-------------------------------|-------------------------------|-------------------------------|-------------------------------|-------------------------------|
| PAININ3  | How much did pain interfere with your enjoyment of life?.....                                                     | <input type="checkbox"/><br>1 | <input type="checkbox"/><br>2 | <input type="checkbox"/><br>3 | <input type="checkbox"/><br>4 | <input type="checkbox"/><br>5 |
| PAININ8  | How much did pain interfere with your ability to concentrate?.....                                                | <input type="checkbox"/><br>1 | <input type="checkbox"/><br>2 | <input type="checkbox"/><br>3 | <input type="checkbox"/><br>4 | <input type="checkbox"/><br>5 |
| PAININ9  | How much did pain interfere with your day to day activities?.....                                                 | <input type="checkbox"/><br>1 | <input type="checkbox"/><br>2 | <input type="checkbox"/><br>3 | <input type="checkbox"/><br>4 | <input type="checkbox"/><br>5 |
| PAININ10 | How much did pain interfere with your enjoyment of recreational activities?.....                                  | <input type="checkbox"/><br>1 | <input type="checkbox"/><br>2 | <input type="checkbox"/><br>3 | <input type="checkbox"/><br>4 | <input type="checkbox"/><br>5 |
| PAININ14 | How much did pain interfere with doing your tasks away from home (e.g., getting groceries, running errands)?..... | <input type="checkbox"/><br>1 | <input type="checkbox"/><br>2 | <input type="checkbox"/><br>3 | <input type="checkbox"/><br>4 | <input type="checkbox"/><br>5 |
| PAININ26 | How often did pain keep you from socializing with others?.....                                                    | <input type="checkbox"/><br>1 | <input type="checkbox"/><br>2 | <input type="checkbox"/><br>3 | <input type="checkbox"/><br>4 | <input type="checkbox"/><br>5 |

## Pain Behavior – Short Form 1

Please respond to each item by marking one box per row.

In the past 7 days....

|          |                                                              | Had no<br>Pain                | Never                         | Rarely                        | Sometimes                     | Often                         | Always                        |
|----------|--------------------------------------------------------------|-------------------------------|-------------------------------|-------------------------------|-------------------------------|-------------------------------|-------------------------------|
| PAINBE2  | When I was in pain I became irritable.....                   | <input type="checkbox"/><br>1 | <input type="checkbox"/><br>2 | <input type="checkbox"/><br>3 | <input type="checkbox"/><br>4 | <input type="checkbox"/><br>5 | <input type="checkbox"/><br>6 |
| PAINBE3  | When I was in pain I grimaced .....                          | <input type="checkbox"/><br>1 | <input type="checkbox"/><br>2 | <input type="checkbox"/><br>3 | <input type="checkbox"/><br>4 | <input type="checkbox"/><br>5 | <input type="checkbox"/><br>6 |
| PAINBE8  | When I was in pain I moved extremely slowly.....             | <input type="checkbox"/><br>1 | <input type="checkbox"/><br>2 | <input type="checkbox"/><br>3 | <input type="checkbox"/><br>4 | <input type="checkbox"/><br>5 | <input type="checkbox"/><br>6 |
| PAINBE24 | When I was in pain I moved stiffly ...                       | <input type="checkbox"/><br>1 | <input type="checkbox"/><br>2 | <input type="checkbox"/><br>3 | <input type="checkbox"/><br>4 | <input type="checkbox"/><br>5 | <input type="checkbox"/><br>6 |
| PAINBE25 | When I was in pain I called out for someone to help me ..... | <input type="checkbox"/><br>1 | <input type="checkbox"/><br>2 | <input type="checkbox"/><br>3 | <input type="checkbox"/><br>4 | <input type="checkbox"/><br>5 | <input type="checkbox"/><br>6 |
| PAINBE37 | When I was in pain I isolated myself from others.....        | <input type="checkbox"/><br>1 | <input type="checkbox"/><br>2 | <input type="checkbox"/><br>3 | <input type="checkbox"/><br>4 | <input type="checkbox"/><br>5 | <input type="checkbox"/><br>6 |
| PAINBE45 | When I was in pain I thrashed .....                          | <input type="checkbox"/><br>1 | <input type="checkbox"/><br>2 | <input type="checkbox"/><br>3 | <input type="checkbox"/><br>4 | <input type="checkbox"/><br>5 | <input type="checkbox"/><br>6 |
